# Supplementary material for: Layer-stacked cobalt ferrite (CoFe2O4) mesoporous platelets for high-performance lithium ion battery anodes
Source: Royal Society of Chemistry journal article supplement (doi:10.1039/c5ta00073d), 2015-01-01
Supplement: c5ta00073d1.pdf [file c5ta00073d1.pdf]

## Supporting Information

### Layer-stacked cobalt ferrite (CoFe<sub>2</sub>O<sub>4</sub>) mesoporous platelets for high-performance lithium ion battery anodes

Zhenyu Zhang, Wenyue Li, Rujia Zou, Wenpei Kang, Ying San Chui, Muk Fung Yuen, Chun-Sing Lee, and Wenjun Zhang\*

**Table S1.** Summary of the electrochemical performances of previous works on CoFe<sub>2</sub>O<sub>4</sub>-based anodes and our work.

| Paper cited                                   | Structure and composition                                                      | Electrochemical performance                                                                              |
|-----------------------------------------------|--------------------------------------------------------------------------------|----------------------------------------------------------------------------------------------------------|
| J. Power Sources (2014) 260: 205-210          | CoFe <sub>2</sub> O <sub>4</sub> in carbon nanofibres                          | 705 mAh g <sup>-1</sup> at 0.1 C for 250 cycles                                                          |
| Nano. Research (2014) 7: 1116-1127            | CoFe <sub>2</sub> O <sub>4</sub> porous ball-in-ball hollow spheres            | 895 mAh g <sup>-1</sup> at 0.1C for 70 cycles                                                            |
| J. Power Sources (2014) 256: 153-159          | CoFe <sub>2</sub> O <sub>4</sub> flower-like microspheres                      | 733.5 mAh g <sup>-1</sup> at 0.2 C for 50 cycles                                                         |
| J. Phys. Chem. C (2014) 118: 11234-11243      | Co <sub>3</sub> O <sub>4</sub> /CoFe <sub>2</sub> O <sub>4</sub> Nanocomposite | 896.4 mAh g <sup>-1</sup> at 0.07 C for 60 cycles,<br>328.1 mAh g <sup>-1</sup> at 6.6 C                 |
| J. Power Sources (2014) 247: 163-169          | CoFe <sub>2</sub> O <sub>4</sub> nanorods                                      | 800 mAh g <sup>-1</sup> at 1C for 300 cycles                                                             |
| Carbon (2013) 65: 112-123                     | CoFe <sub>2</sub> O <sub>4</sub> /CNT composite                                | 910 mAh g <sup>-1</sup> at ~0.15 C for 50 cycles                                                         |
| Part. Part. Syst. Charact. (2013) 30: 893-904 | CoFe <sub>2</sub> O <sub>4</sub> /N doped Graphene                             | 800 mAh g <sup>-1</sup> at 0.1 C for 240 cycles                                                          |
| J. Mater. Chem. A (2013) 1: 7444-7450         | Mesoporous CoFe <sub>2</sub> O <sub>4</sub> nanospheres/CNT                    | 1045.6 mA h g <sup>-1</sup> at 0.2 C for 100 cycles                                                      |
| Nanotechnology (2012) 23: 055402              | Hollow CoFe <sub>2</sub> O <sub>4</sub> nanospheres                            | 1266 mA h g <sup>-1</sup> at 0.1 C for 50 cycles                                                         |
| J. Mater. Chem. (2012) 22: 19738              | CoFe <sub>2</sub> O <sub>4</sub> /graphene sandwich                            | 1047 mAh g <sup>-1</sup> at 0.2 C for 160 cycles                                                         |
| Chem. Commun. (2012) 48: 410-412              | CoO/CoFe <sub>2</sub> O <sub>4</sub> nanocomposites                            | 603 mAh g <sup>-1</sup> at 1 C for 100 cycles                                                            |
| J. Power Sources (2007) 172: 379-387          | CoFe <sub>2</sub> O <sub>4</sub> nanoparticles from sol-gel method             | 739 mAh g <sup>-1</sup> at 1 C for 75 cycles                                                             |
| Nanoscale (2014) 6: 15168-15174               | Hollow porous CoFe <sub>2</sub> O <sub>4</sub> nanocubes                       | 1115 mA h g <sup>-1</sup> at 1C after 200 cycles                                                         |
| <b>Our work</b>                               | <b>CoFe<sub>2</sub>O<sub>4</sub> mesoporous platelets</b>                      | <b>1720 mAh g<sup>-1</sup> at ~1 C for 500 cycles,<br/>580 mAh g<sup>-1</sup> at ~5 C for 2000 cycle</b> |

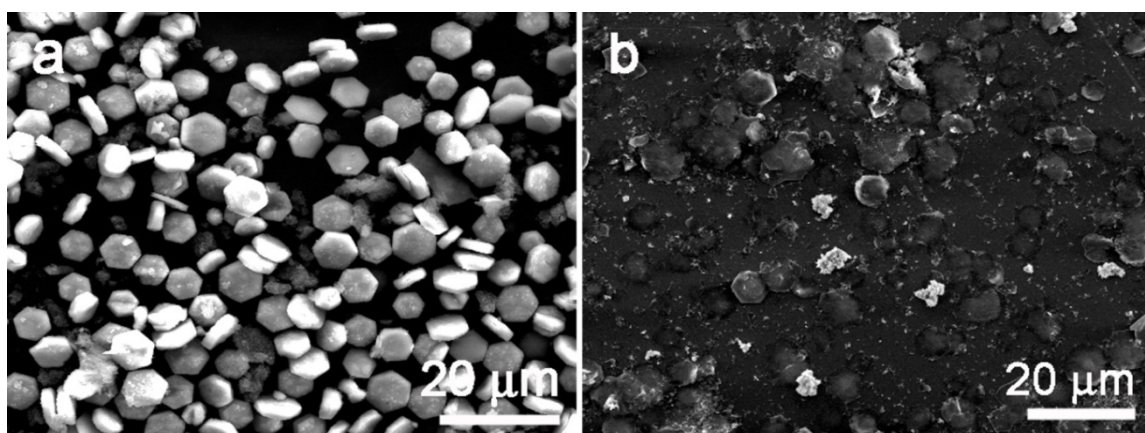

**Fig. S1** Low magnification SEM images of (a) thick and (b) thin  $\text{Co}_x\text{Fe}_{1-x}(\text{OH})_2$  sheets. The images were obtained by dispersing the sheets in ethanol and dropping the suspension onto silicon wafer.

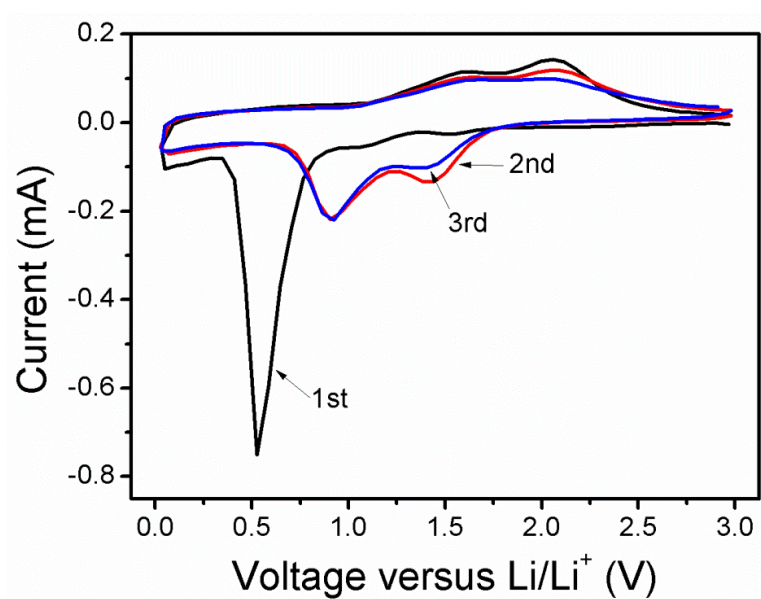

**Fig. S2** CV curves of the cell with thin  $\text{CoFe}_2\text{O}_4$  platelets.

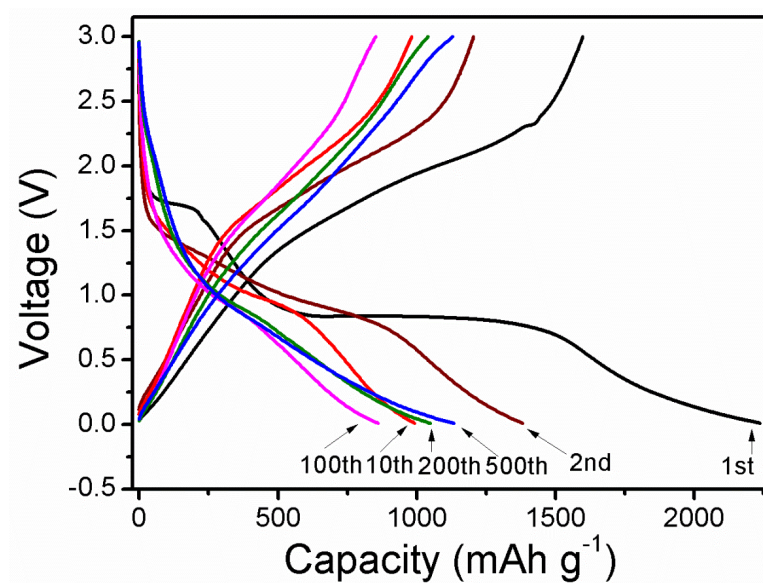

**Fig. S3** Galvanostatic charge-discharge curves for the cell with thin CoFe<sub>2</sub>O<sub>4</sub> platelets.

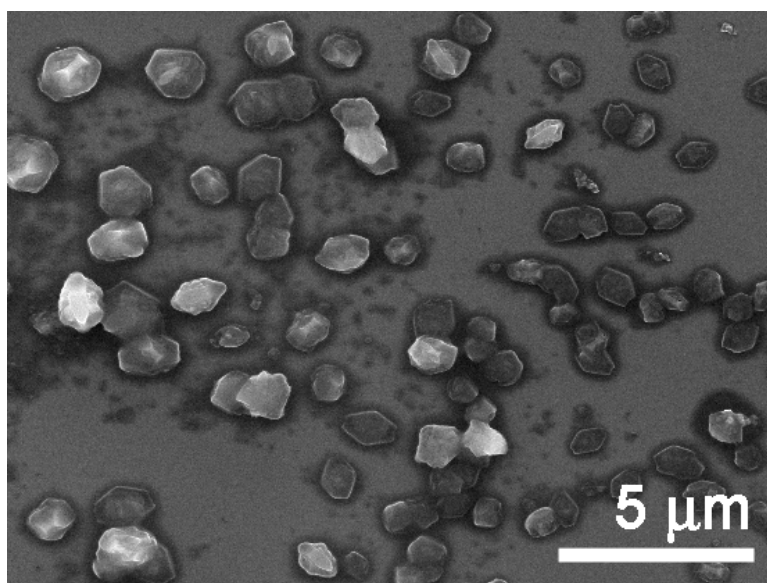

**Fig. S4** The SEM morphology of the thin CoFe<sub>2</sub>O<sub>4</sub> platelets after 2000 cycles at 5 A g<sup>-1</sup>. The images are obtained by dispersing the platelets in ethanol and dropping the suspension onto silicon wafer.

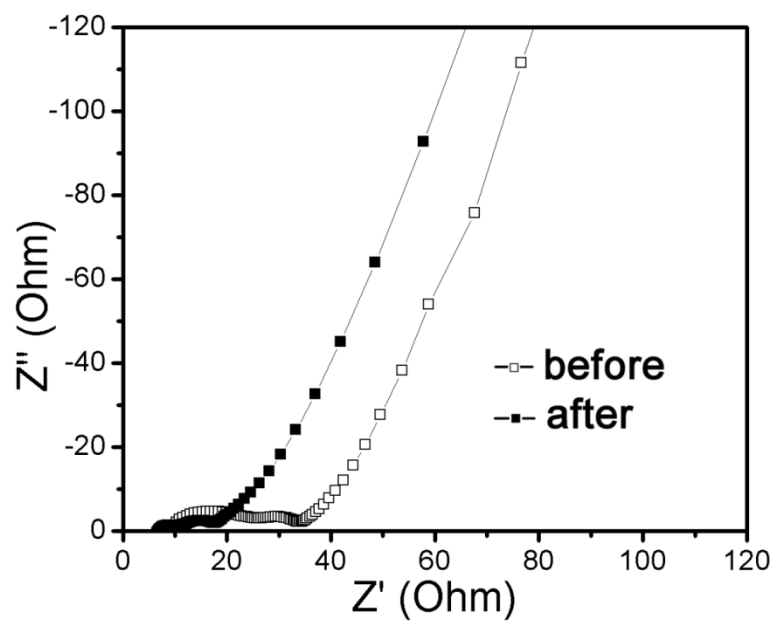

**Fig. S5** EIS intercepts of the cell with thin  $\text{CoFe}_2\text{O}_4$  platelets before and after 2000 cycles at  $5 \text{ A g}^{-1}$ .
